# Supplementary material for: Integrated analysis of bulk and single-cell RNA sequencing reveals the impact of nicotinamide and tryptophan metabolism on glioma prognosis and immunotherapy sensitivity
Source: PubMed Central journal article supplement — BMC Neurol. 2024 Oct 28;24:419. doi: 10.1186/s12883-024-03924-5 (PMC11514892; doi:10.1186/s12883-024-03924-5), 2024-10-28
Supplement: 12883_2024_3924_MOESM1_ESM.pdf [file 12883_2024_3924_MOESM1_ESM.pdf]

**Supplementary Table 1 The detailed clinical features of glioma patients in TCGA RNAseq**

| <b>Characteristics</b>           | <b>Total</b> |
|----------------------------------|--------------|
| <b>Age</b>                       |              |
| ≥60                              | 158(22.87%)  |
| <60                              | 533(77.13%)  |
| <b>Gender</b>                    |              |
| Female                           | 296(42.84%)  |
| Male                             | 395(57.16%)  |
| <b>Race</b>                      |              |
| American indian or alaska native | 1(0.14%)     |
| Asian                            | 13(1.88%)    |
| Black or african american        | 33(4.78%)    |
| Not reported                     | 12(1.74%)    |
| White                            | 632(91.46%)  |
| <b>WHO grade</b>                 |              |
| G2                               | 257(37.19%)  |
| G3                               | 266(38.49%)  |
| G4                               | 167(24.17%)  |
| Not reported                     | 1(0.14%)     |
| <b>Sample type</b>               |              |
| Primary Tumor                    | 660(95.51%)  |
| Recurrent Tumor                  | 31(4.49%)    |
| <b>Radiation therapy</b>         |              |
| NO                               | 194(28.08%)  |
| YES                              | 421(60.93%)  |
| Not reported                     | 76(11.00%)   |
| <b>IDH mutation status</b>       |              |
| mutation                         | 407(58.90%)  |
| not reported                     | 17(2.46%)    |
| wild-type                        | 267(38.64%)  |

**Supplementary Table 2 The detailed clinical features of glioma patients in CGGA mRNaseq693**

| <b>Characteristics</b>          | <b>Total</b> |
|---------------------------------|--------------|
| <b>Sample type</b>              |              |
| Primary Tumor                   | 404(61.49%)  |
| Recurrent Tumor                 | 253(38.51%)  |
| <b>Grade</b>                    |              |
| WHO II                          | 172(26.18%)  |
| WHO III                         | 248(37.75%)  |
| WHO IV                          | 237(36.07%)  |
| <b>Gender</b>                   |              |
| Female                          | 283(43.07%)  |
| Male                            | 374(56.93%)  |
| <b>Age</b>                      |              |
| ≥60                             | 80(12.18%)   |
| <60                             | 576(87.67%)  |
| Not reported                    | 1(0.15%)     |
| <b>Radio status</b>             |              |
| Untreated                       | 131(19.94%)  |
| Treated                         | 501(76.26%)  |
| Not reported                    | 25(3.81%)    |
| <b>Chemo status</b>             |              |
| Untreated                       | 156(23.74%)  |
| Treated                         | 480(73.06%)  |
| Not reported                    | 21(3.20%)    |
| <b>IDH mutation status</b>      |              |
| Mutant                          | 333(50.68%)  |
| Wildtype                        | 276(42.01%)  |
| Not reported                    | 48(7.31%)    |
| <b>1p19q codeletion status</b>  |              |
| Codel                           | 137(20.85%)  |
| Non-codel                       | 454(69.10%)  |
| Not reported                    | 66(10.05%)   |
| <b>MGMTp methylation status</b> |              |
| Methylated                      | 304(46.27%)  |
| Un-methylated                   | 218(33.18%)  |
| Not reported                    | 135(20.55%)  |

**Supplementary Table 3 The detailed clinical features of glioma patients in CGGA mRNAseq325**

| <b>Characteristics</b>          | <b>Total</b> |
|---------------------------------|--------------|
| <b>Sample type</b>              |              |
| Primary Tumor                   | 222(70.93%)  |
| Recurrent Tumor                 | 58(18.53%)   |
| Secondary Tumor <sup>1</sup>    | 29(9.27%)    |
| Not reported                    | 4(1.28%)     |
| <b>Grade</b>                    |              |
| WHO II                          | 98(31.31%)   |
| WHO III                         | 74(23.64%)   |
| WHO IV                          | 137(43.77%)  |
| Not reported                    | 4(1.28%)     |
| <b>Gender</b>                   |              |
| Female                          | 116(37.06%)  |
| Male                            | 197(62.94%)  |
| <b>Age</b>                      |              |
| ≥60                             | 33(10.54%)   |
| <60                             | 280(89.46%)  |
| <b>Radio status</b>             |              |
| Untreated                       | 62(19.81%)   |
| Treated                         | 241(77.00%)  |
| Not reported                    | 10(3.19%)    |
| <b>Chemo status</b>             |              |
| Untreated                       | 110(35.14%)  |
| Treated                         | 190(60.70%)  |
| Not reported                    | 13(4.15%)    |
| <b>IDH mutation status</b>      |              |
| Mutant                          | 167(53.35%)  |
| Wildtype                        | 145(46.33%)  |
| Not reported                    | 1(0.32%)     |
| <b>1p19q codeletion status</b>  |              |
| Codel                           | 62(19.81%)   |
| Non-codel                       | 243(77.64%)  |
| Not reported                    | 8(2.56%)     |
| <b>MGMTp methylation status</b> |              |
| Methylated                      | 152(48.56%)  |
| Un-methylated                   | 143(45.69%)  |
| Not reported                    | 18(5.75%)    |

1. A secondary tumor is a cancer that has spread or metastasized to another part of the body from where it first began. In gliomas, a secondary tumor generally refers to a glioma that develops again in patient but in a different location from where the tumor was when it was first treated.

**Supplementary Table 4 The detailed clinical features of glioma patients in CGGA mRNAarray301**

| <b>Characteristics</b>          | <b>Total</b> |
|---------------------------------|--------------|
| <b>Sample type</b>              |              |
| Primary Tumor                   | 264(87.71%)  |
| Recurrent Tumor                 | 23(7.64%)    |
| Secondary Tumor <sup>1</sup>    | 11(3.65%)    |
| Not reported                    | 3(1.00%)     |
| <b>Grade</b>                    |              |
| WHO II                          | 117(38.87%)  |
| WHO III                         | 57(18.94%)   |
| WHO IV                          | 124(41.20%)  |
| Not reported                    | 3(1.00%)     |
| <b>Gender</b>                   |              |
| Female                          | 121(40.20%)  |
| Male                            | 180(59.80%)  |
| <b>Age</b>                      |              |
| ≥60                             | 29(10.18%)   |
| <60                             | 254(89.12%)  |
| <b>Radio status</b>             |              |
| NO                              | 46(15.28%)   |
| YES                             | 237(78.74%)  |
| Not reported                    | 18(5.98%)    |
| <b>Chemo status</b>             |              |
| NO                              | 144(47.84%)  |
| YES                             | 133(44.19%)  |
| Not reported                    | 24(7.97%)    |
| <b>IDH mutation status</b>      |              |
| Mutant                          | 134(44.52%)  |
| Wildtype                        | 165(54.82%)  |
| Not reported                    | 2(0.66%)     |
| <b>1p19q Codeletion status</b>  |              |
| Code1                           | 16(5.32%)    |
| Non-code1                       | 76(25.25%)   |
| Not reported                    | 209(69.44%)  |
| <b>MGMTp methylation status</b> |              |
| Methylated                      | 99(32.89%)   |
| Not reported                    | 15(4.98%)    |
| Un-methylated                   | 187(62.13%)  |

1. A secondary tumor is a cancer that has spread or metastasized to another part of the body from where it first began. In gliomas, a secondary tumor generally refers to a glioma that develops again in patient but in a different location from where the tumor was when it was first treated.

**Supplementary Table 5 GO and KEGG pathway analysis of up-regulated genes in cluster1 relative to cluster2**

| <b>Category</b>           | <b>Description</b>                            | <b>Gene Ratio</b> | <b>P value</b> |
|---------------------------|-----------------------------------------------|-------------------|----------------|
| <b>Biological process</b> | Immune effector process                       | 112/479           | 9.67E-30       |
|                           | External encapsulating structure organization | 60/479            | 2.58E-28       |
|                           | Defense response                              | 131/479           | 6.44E-28       |
|                           | Cell activation                               | 116/479           | 1.50E-27       |
|                           | Response to cytokine                          | 102/479           | 1.01E-26       |
| <b>Cellular component</b> | Collagen containing extracellular matrix      | 79/415            | 1.34E-41       |
|                           | External encapsulating structure              | 90/415            | 1.40E-41       |
|                           | Secretory granule                             | 76/415            | 8.06E-19       |
|                           | Endoplasmic reticulum lumen                   | 43/415            | 7.16E-18       |
|                           | MHC class II protein complex                  | 12/415            | 5.72E-16       |
| <b>Molecular function</b> | Extracellular matrix structural constituent   | 37/448            | 1.57E-22       |
|                           | Signaling receptor binding                    | 102/448           | 8.23E-15       |
|                           | Integrin binding                              | 25/448            | 2.31E-13       |
|                           | Growth factor binding                         | 23/448            | 5.96E-12       |
|                           | Collagen binding                              | 16/448            | 5.26E-11       |
| <b>KEGG pathways</b>      | ECM-receptor interaction                      | 19/263            | 4.85E-11       |
|                           | Cell adhesion molecules (CAMs)                | 18/263            | 1.58E-06       |
|                           | Th1 and Th2 cell differentiation              | 12/263            | 4.80E-05       |
|                           | NOD-like receptor signaling pathway           | 17/263            | 0.000102182    |
|                           | Th17 cell differentiation                     | 12/263            | 0.000210563    |

**Supplementary Table 6 GO and KEGG pathway analysis of down-regulated genes in cluster1 relative to cluster2**

| <b>Category</b>           | <b>Description</b>                           | <b>Gene Ratio</b> | <b>P value</b> |
|---------------------------|----------------------------------------------|-------------------|----------------|
| <b>Biological process</b> | Synaptic signaling                           | 127/546           | 1.34E-62       |
|                           | Cell cell signaling                          | 168/546           | 5.70E-47       |
|                           | Regulation of trans synaptic signaling       | 81/546            | 3.98E-43       |
|                           | Neurogenesis                                 | 156/546           | 4.02E-41       |
|                           | Neuron differentiation                       | 137/546           | 1.07E-37       |
| <b>Cellular component</b> | Synapse                                      | 205/480           | 4.73E-90       |
|                           | Neuron projection                            | 179/480           | 5.79E-65       |
|                           | Postsynapse                                  | 112/480           | 1.59E-52       |
|                           | Somatodendritic compartment                  | 124/480           | 7.16E-48       |
|                           | Synaptic membrane                            | 81/480            | 2.18E-43       |
| <b>Molecular function</b> | Gated channel activity                       | 49/491            | 7.48E-17       |
|                           | Passive transmembrane transporter activity   | 55/491            | 9.65E-15       |
|                           | Cation transmembrane transporter activity    | 62/491            | 1.14E-13       |
|                           | Metal ion transmembrane transporter activity | 49/491            | 2.38E-13       |
|                           | Cation channel activity                      | 43/491            | 2.38E-13       |
| <b>KEGG pathways</b>      | cAMP signaling pathway                       | 26/231            | 6.03E-10       |
|                           | Calcium signaling pathway                    | 18/231            | 1.24E-05       |
|                           | Wnt signaling pathway                        | 10/231            | 0.018534501    |
|                           | Alanine, aspartate and glutamate metabolism  | 4/231             | 0.02004155     |
|                           | Regulation of lipolysis in adipocytes        | 5/231             | 0.021590081    |
