# Supplementary material for: Integrated analysis of bulk and single-cell RNA sequencing reveals the impact of nicotinamide and tryptophan metabolism on glioma prognosis and immunotherapy sensitivity
Source: PubMed Central journal article supplement — BMC Neurol. 2024 Oct 28;24:419. doi: 10.1186/s12883-024-03924-5 (PMC11514892; doi:10.1186/s12883-024-03924-5), 2024-10-28
Supplement: 12883_2024_3924_MOESM2_ESM.pdf [file 12883_2024_3924_MOESM2_ESM.pdf]

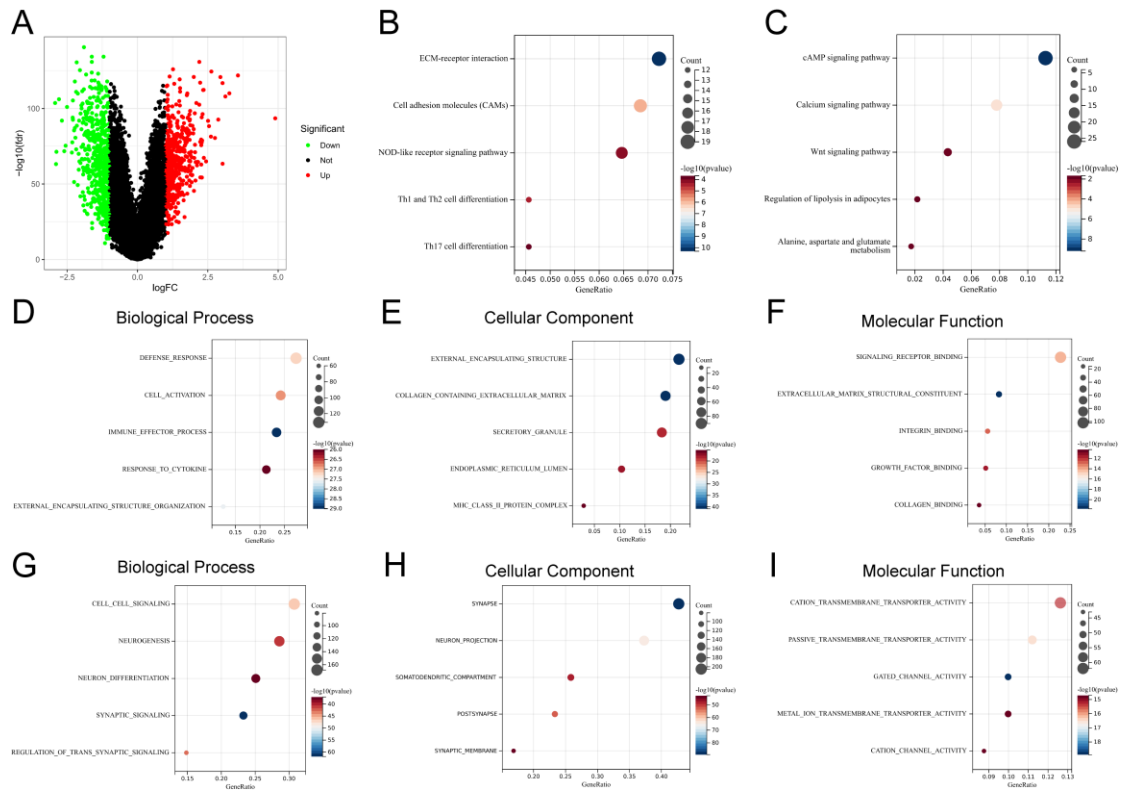

**Supplementary Figure 1.** Differential expression genes and functional analysis of two subgroups related to nicotinamide metabolism. (A) Volcano map of differentially expressed genes in two subgroups related to nicotinamide metabolism. Red and green represent differentially expressed genes up- and down-regulated by cluster1 compared to cluster2. (B) Bubble plots of up-regulated genes for KEGG enrichment analysis. (C) Bubble plots of down-regulated genes for KEGG enrichment analysis. (D-F) Bubble plots of up-regulated genes for GO enrichment analysis. (G-I) Bubble plots of down-regulated genes for GO enrichment analysis.

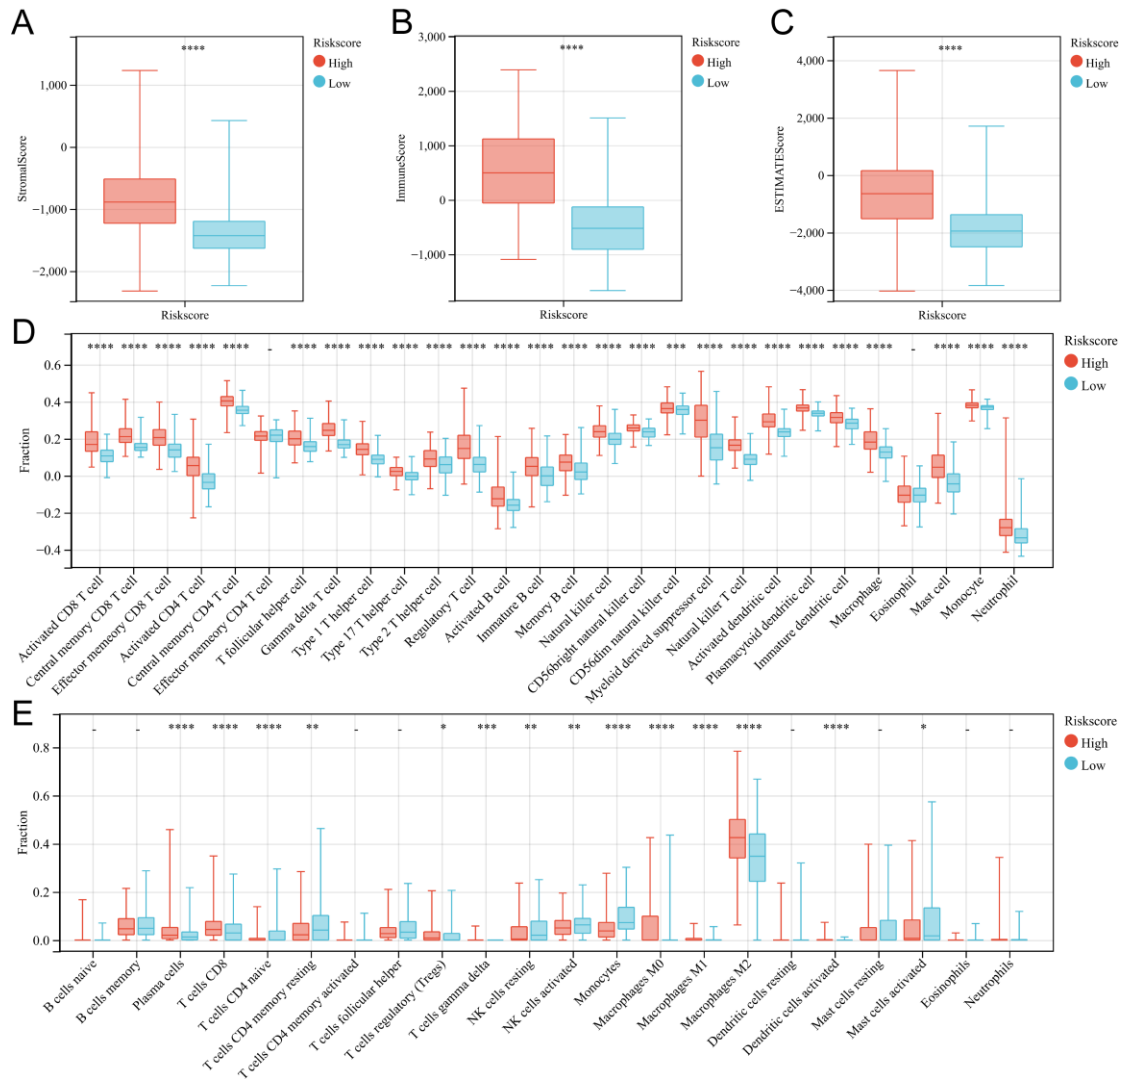

**Supplementary Figure 2.** Analysis of immune cell infiltration in two subgroups related to the risk score of CGGA mRNAseq693. (A-C) Box plot of stromal score (A), immune score (B), and ESTIMATE score (C) for patients in the high and low-risk score groups. (D) Box plot of immune cell infiltration levels high-risk score and low-risk score groups analyzed by ssGSEA. (E) Box plot of immune cell infiltration levels in high-risk score and low-risk score groups analyzed by CIBERSORT. \*P < 0.05; \*\*P < 0.01; \*\*\*P < 0.001, \*\*\*\*P < 0.0001; -, not significant.

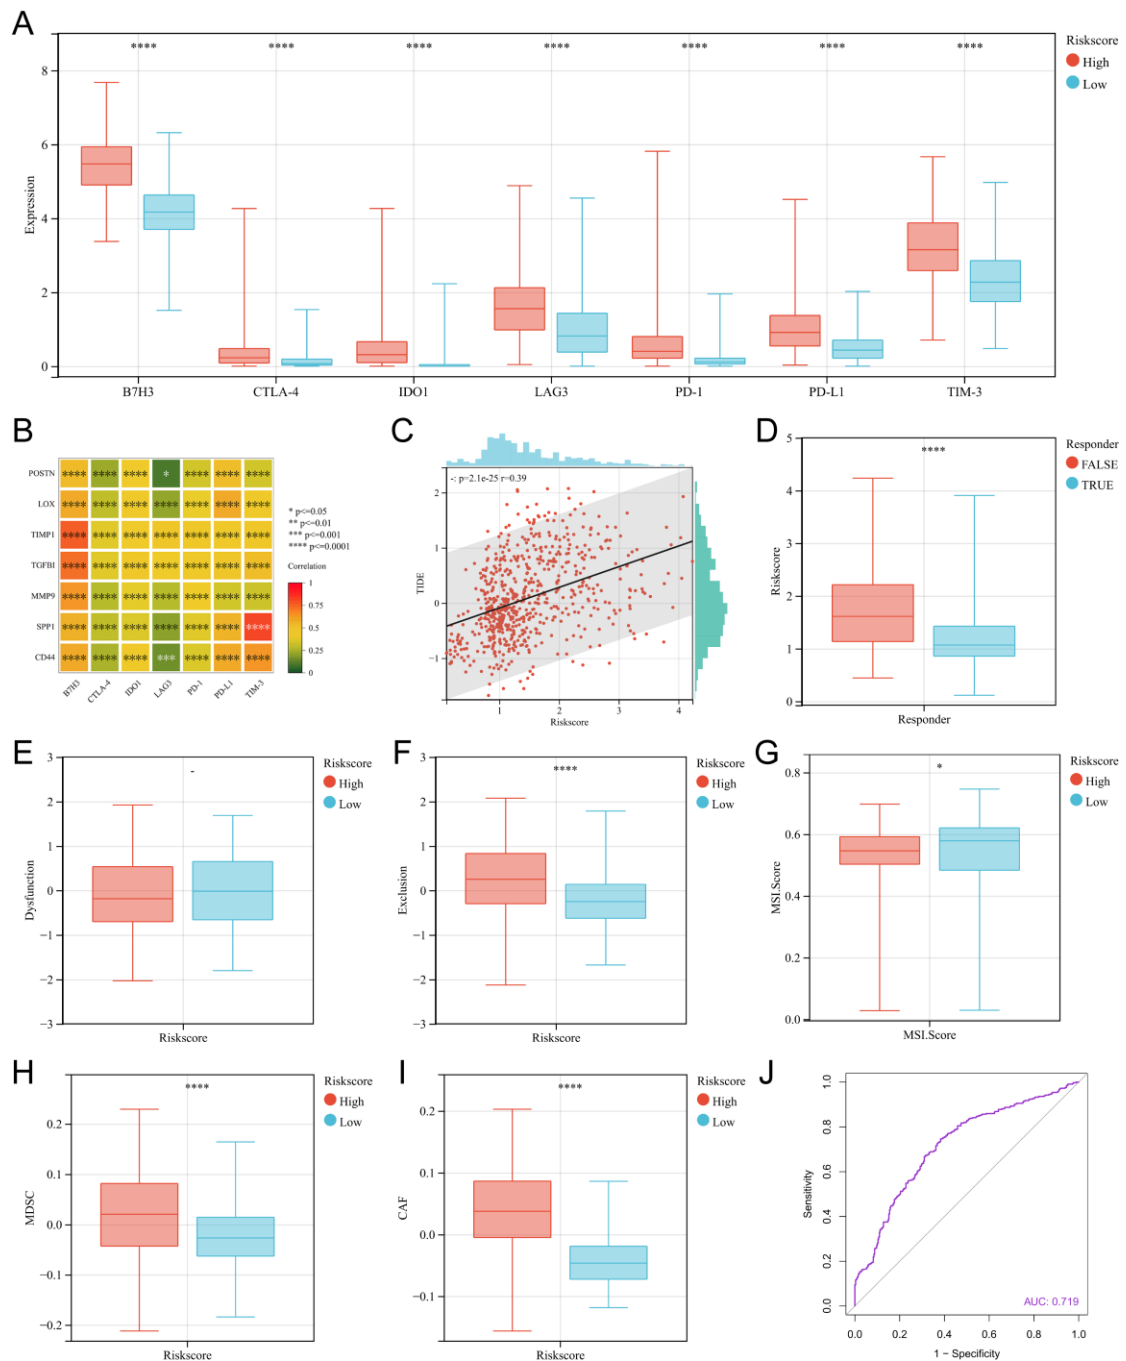

**Supplementary Figure 3.** The predictive role of risk model of CGGA mRNAseq693 for ICI treatment response. **(A)** Box plots of immune checkpoint expression in the high-risk score group and low-risk score group. **(B)** Correlation analysis between the expression levels of risk model-related genes and the expression levels of immune checkpoints. **(C)** Correlation analysis between the risk score and TIDE score. **(D)** Box plots of risk scores for predicting ICI treatment true responder and false responder gliomas using the TIDE algorithm. **(E)** Box plots of Dysfunction scores for high-risk score group and low-risk score group. **(F)** Box plots of Dysfunction scores for

high-risk score group and low-risk score group. **(G)** Box plot of Dysfunction scores for high-risk score group and low-risk score group. **(H)** Box plots of MDSC for high-risk score group and low-risk score group. **(I)** Box plots of CAF for high-risk score group and low-risk score group. **(J)** ROC curves of the risk score predicting response to ICI treatment.

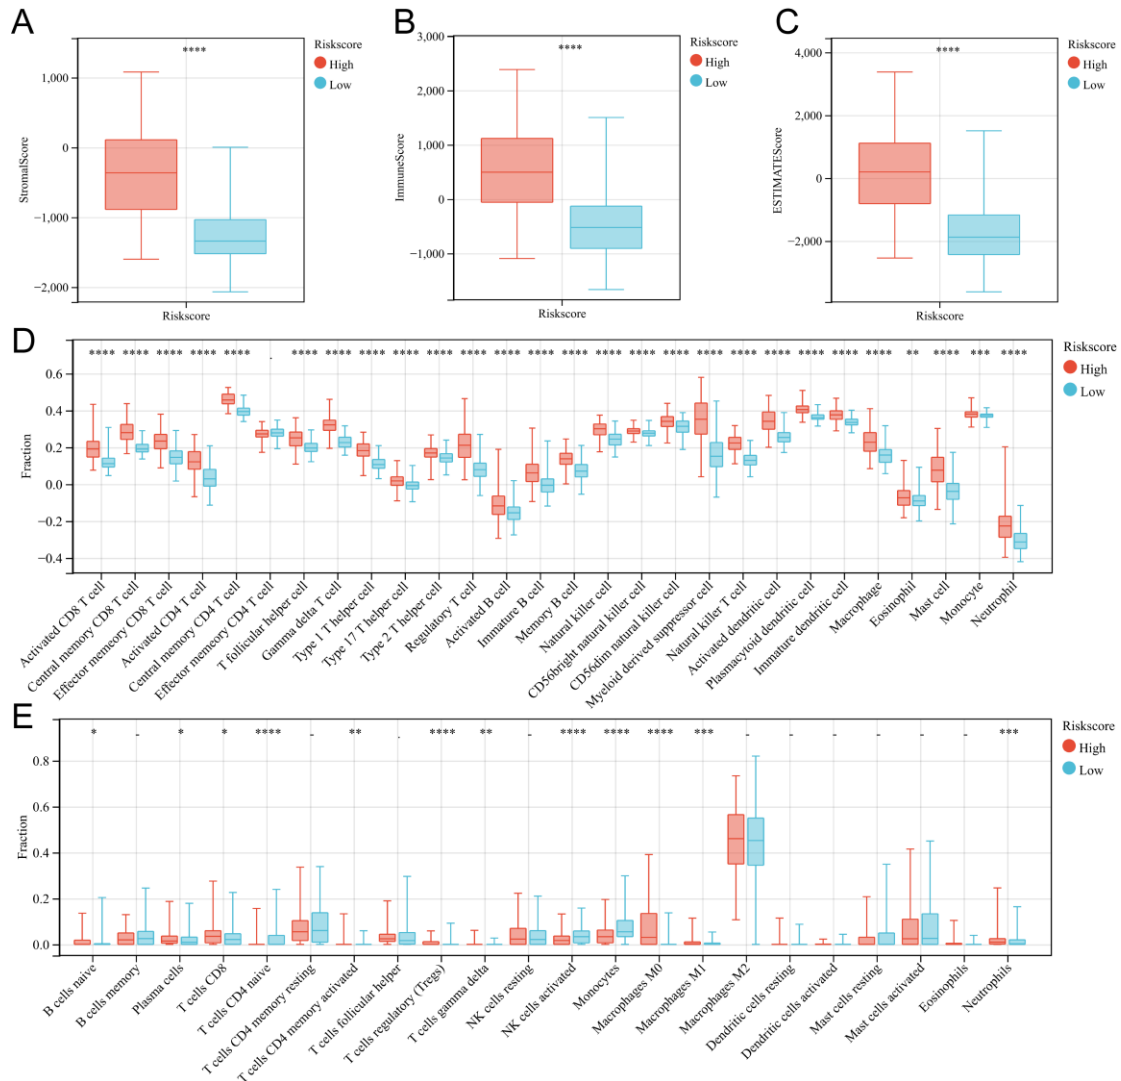

**Supplementary Figure 4.** Analysis of immune cell infiltration in two subgroups related to the risk score of CGGA mRNAseq325. **(A-C)** Box plot of stromal score **(A)**, immune score **(B)**, and ESTIMATE score **(C)** for patients in the high and low-risk score groups. **(D)** Box plot of immune cell infiltration levels high-risk score and low-risk score groups analyzed by ssGSEA. **(E)** Box plot of immune cell infiltration levels in high-risk score and low-risk score groups analyzed by CIBERSORT. \*P < 0.05; \*\*P < 0.01; \*\*\*P < 0.001, \*\*\*\*P < 0.0001; -, not significant.

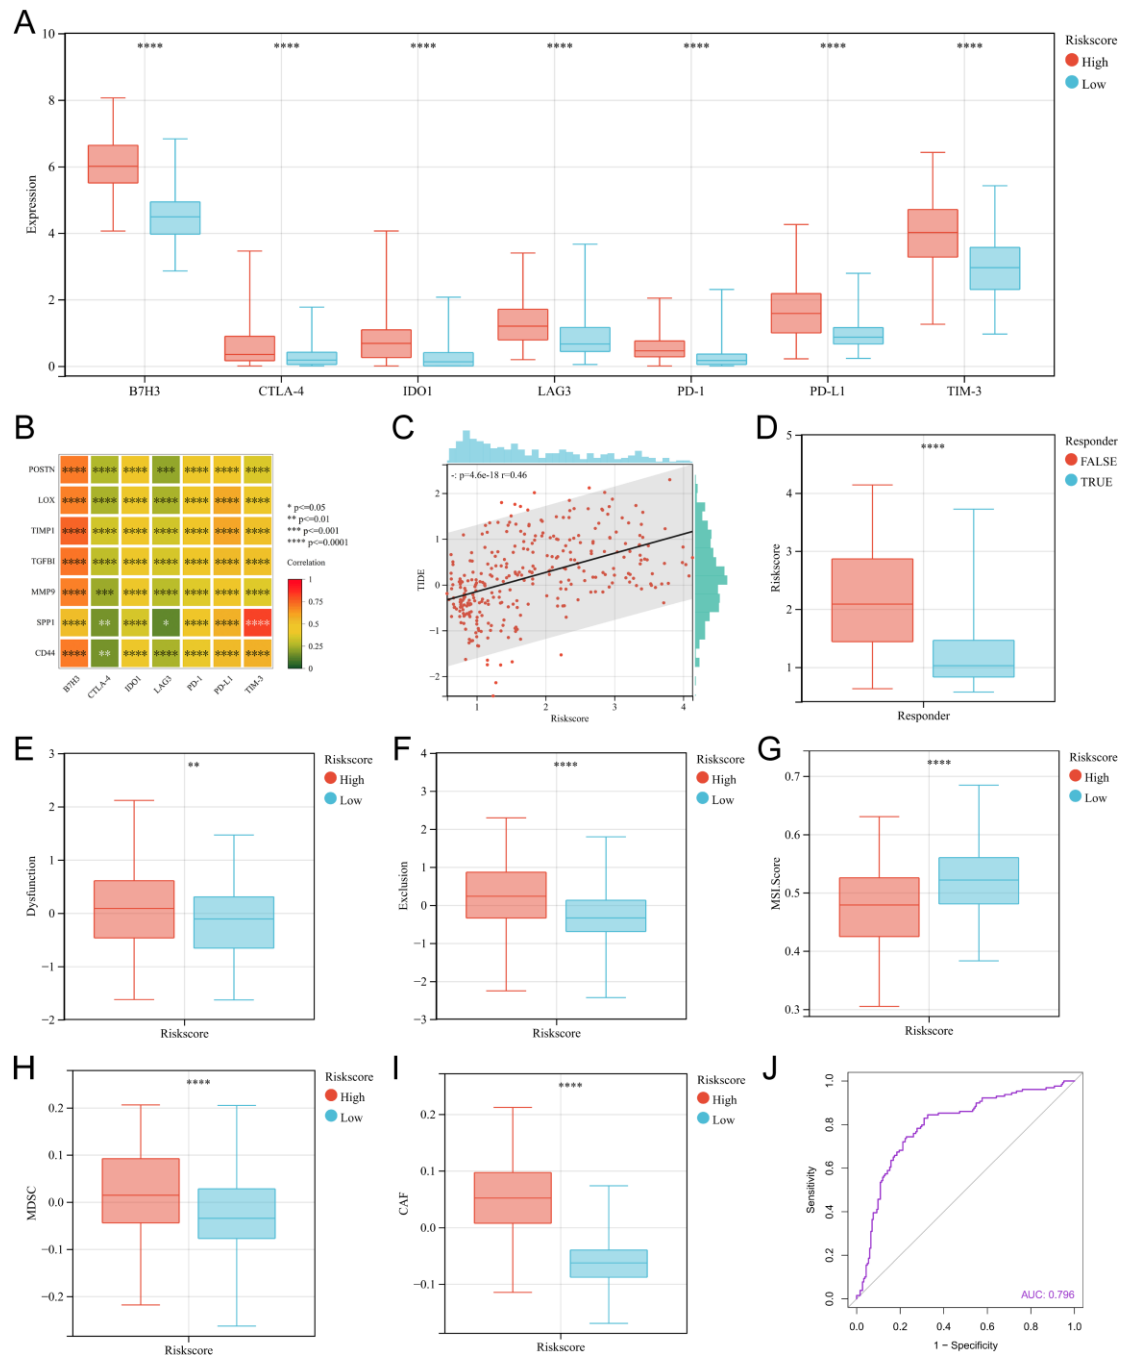

**Supplementary Figure 5.** The predictive role of risk model of CGGA mRNAseq325 for ICI treatment response. **(A)** Box plots of immune checkpoint expression in the high-risk score group and low-risk score group. **(B)** Correlation analysis between the expression levels of risk model-related genes and the expression levels of immune checkpoints. **(C)** Correlation analysis between the risk score and TIDE score. **(D)** Box plots of risk scores for predicting ICI treatment true responder and false responder gliomas using the TIDE algorithm. **(E)** Box plots of Dysfunction scores for high-risk score group and low-risk score group. **(F)** Box plots of Dysfunction scores for

high-risk score group and low-risk score group. **(G)** Box plot of Dysfunction scores for high-risk score group and low-risk score group. **(H)** Box plots of MDSC for high-risk score group and low-risk score group. **(I)** Box plots of CAF for high-risk score group and low-risk score group. **(J)** ROC curves of the risk score predicting response to ICI treatment.

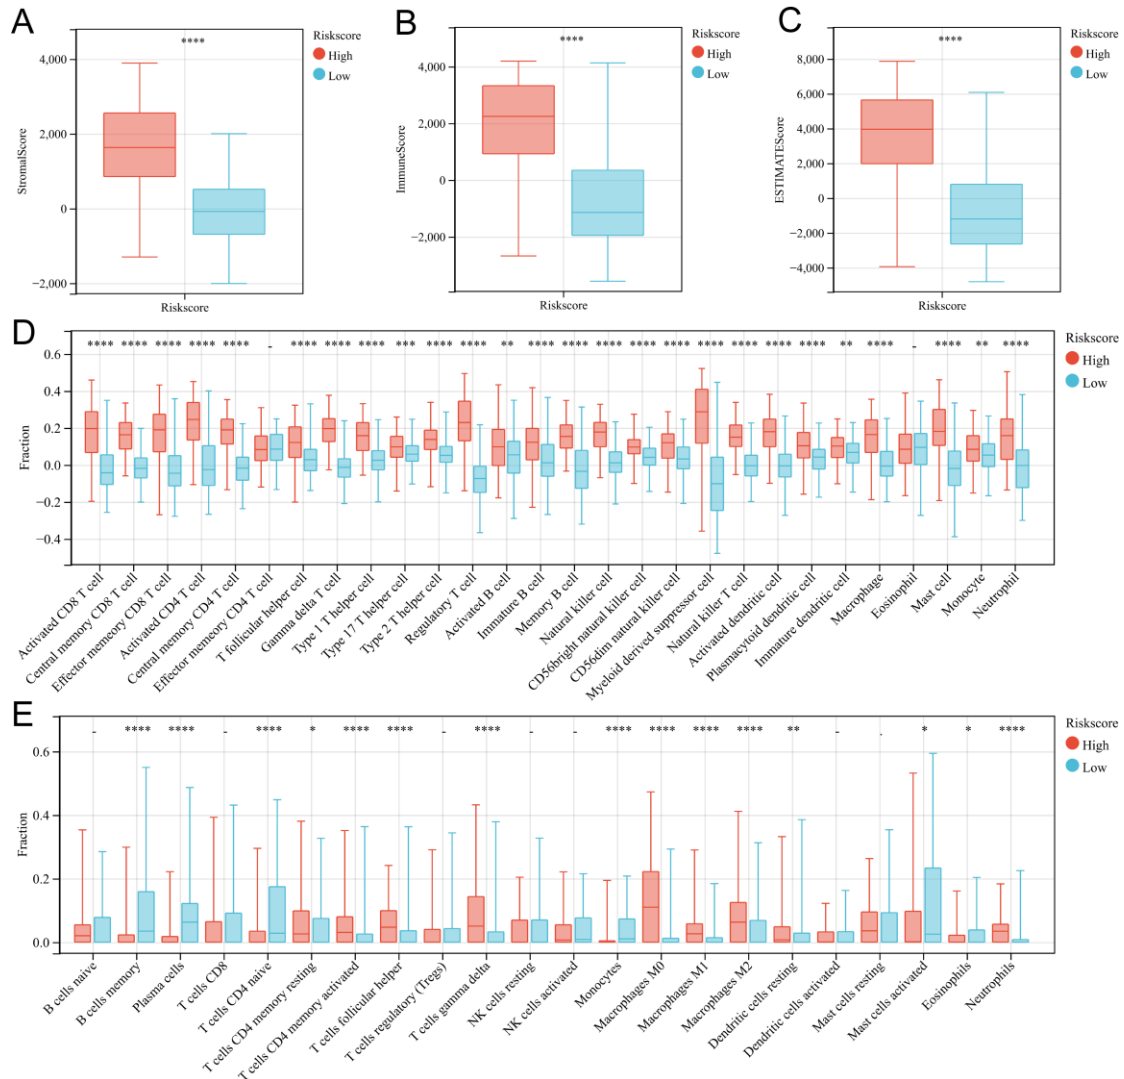

**Supplementary Figure 6.** Analysis of immune cell infiltration in two subgroups related to the risk score of CGGA mRNAarray. **(A-C)** Box plot of stromal score **(A)**, immune score **(B)**, and ESTIMATE score **(C)** for patients in the high and low-risk score groups. **(D)** Box plot of immune cell infiltration levels high-risk score and low-risk score groups analyzed by ssGSEA. **(E)** Box plot of immune cell infiltration levels in high-risk score and low-risk score groups analyzed by CIBERSORT. \*P < 0.05; \*\*P < 0.01; \*\*\*P < 0.001, \*\*\*\*P < 0.0001; -, not significant.



**Supplementary Figure 7.** The predictive role of risk model of CGGA mRNAarray for ICI treatment response. **(A)** Box plots of immune checkpoint expression in the high-risk score group and low-risk score group. **(B)** Correlation analysis between the expression levels of risk model-related genes and the expression levels of immune checkpoints. **(C)** Correlation analysis between the risk score and TIDE score. **(D)** Box plots of risk scores for predicting ICI treatment true responder and false responder gliomas using the TIDE algorithm. **(E)** Box plots of Dysfunction scores for high-risk score group and low-risk score group. **(F)** Box plots of Dysfunction scores for

high-risk score group and low-risk score group. (G) Box plot of Dysfunction scores for high-risk score group and low-risk score group. (H) Box plots of MDSC for high-risk score group and low-risk score group. (I) Box plots of CAF for high-risk score group and low-risk score group. (J) ROC curves of the risk score predicting response to ICI treatment.

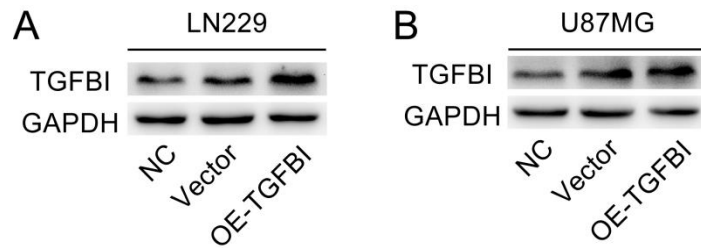

**Supplementary Figure 8.** The expression of TGFBI in LN229 cells and U87-MG cells after overexpression of TGFBI. (A) Western blot was used to detect the expression level of TGFBI in LN229 cells. (B) Western blot was used to detect the expression level of TGFBI in U87-MG cells.
