# Supplementary material for: Integrated analysis of bulk and single-cell RNA sequencing reveals the impact of nicotinamide and tryptophan metabolism on glioma prognosis and immunotherapy sensitivity
Source: PubMed Central journal article supplement — BMC Neurol. 2024 Oct 28;24:419. doi: 10.1186/s12883-024-03924-5 (PMC11514892; doi:10.1186/s12883-024-03924-5), 2024-10-28

Figure 12. The expression of EMT-related proteins in LN229 cells and U87 cells after overexpression of TGFBI and pretreatment with FAK inhibitors. (A-B) Western blot was used to detect the expression levels of N-cadherin and Vimentin in LN229 cells and U87 cells.

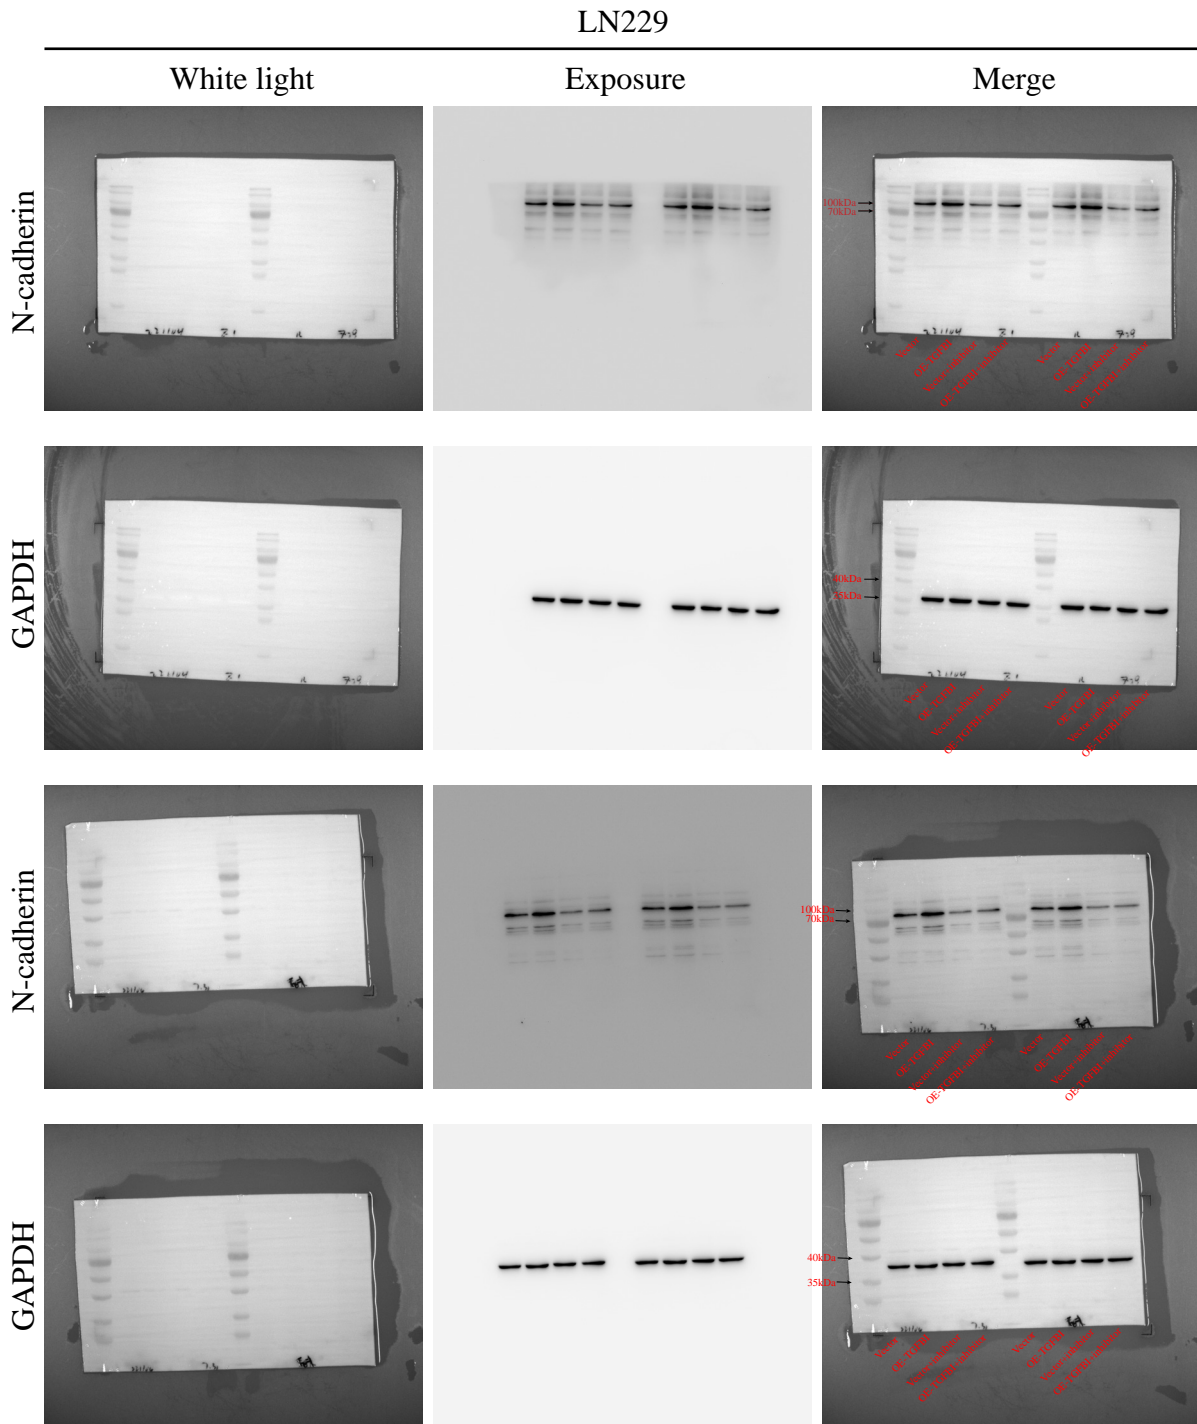

Figure 12. The expression of EMT-related proteins in LN229 cells and U87 cells after overexpression of TGFBI and pretreatment with FAK inhibitors. (A-B) Western blot was used to detect the expression levels of N-cadherin and Vimentin in LN229 cells and U87 cells.

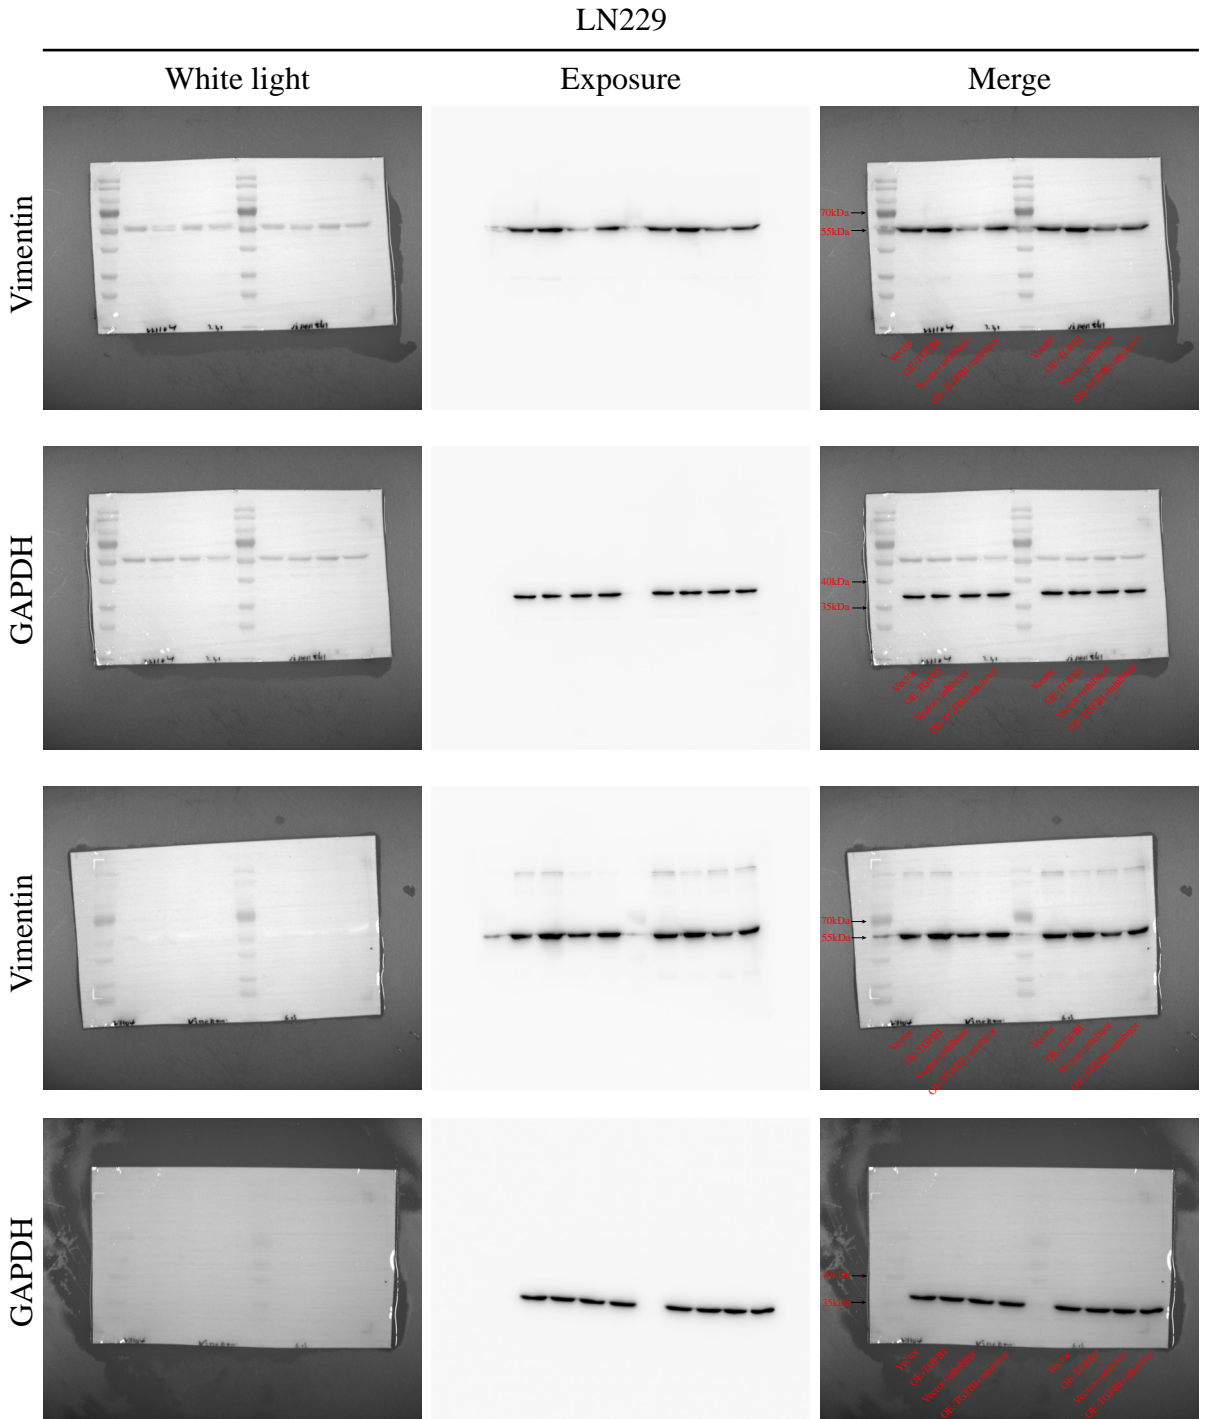

Figure 12. The expression of EMT-related proteins in LN229 cells and U87 cells after overexpression of TGFBI and pretreatment with FAK inhibitors. (A-B) Western blot was used to detect the expression levels of N-cadherin and Vimentin in LN229 cells and U87 cells.

U87

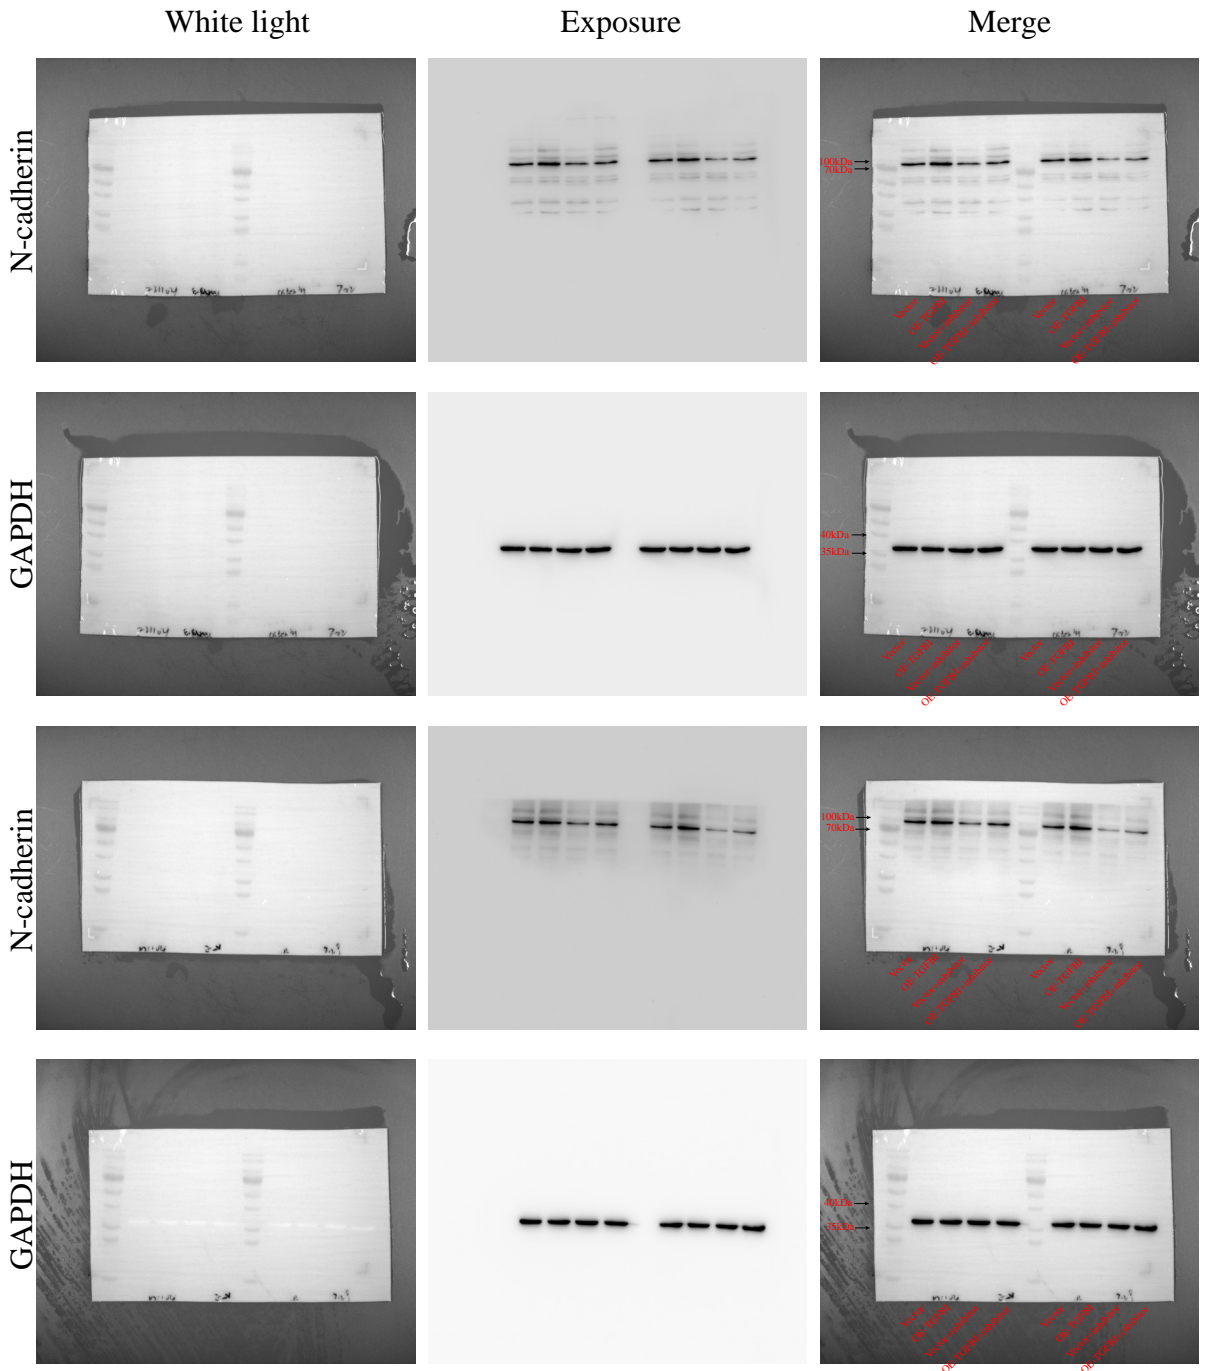

Figure 12. The expression of EMT-related proteins in LN229 cells and U87 cells after overexpression of TGFBI and pretreatment with FAK inhibitors. (A-B) Western blot was used to detect the expression levels of N-cadherin and Vimentin in LN229 cells and U87 cells.

U87

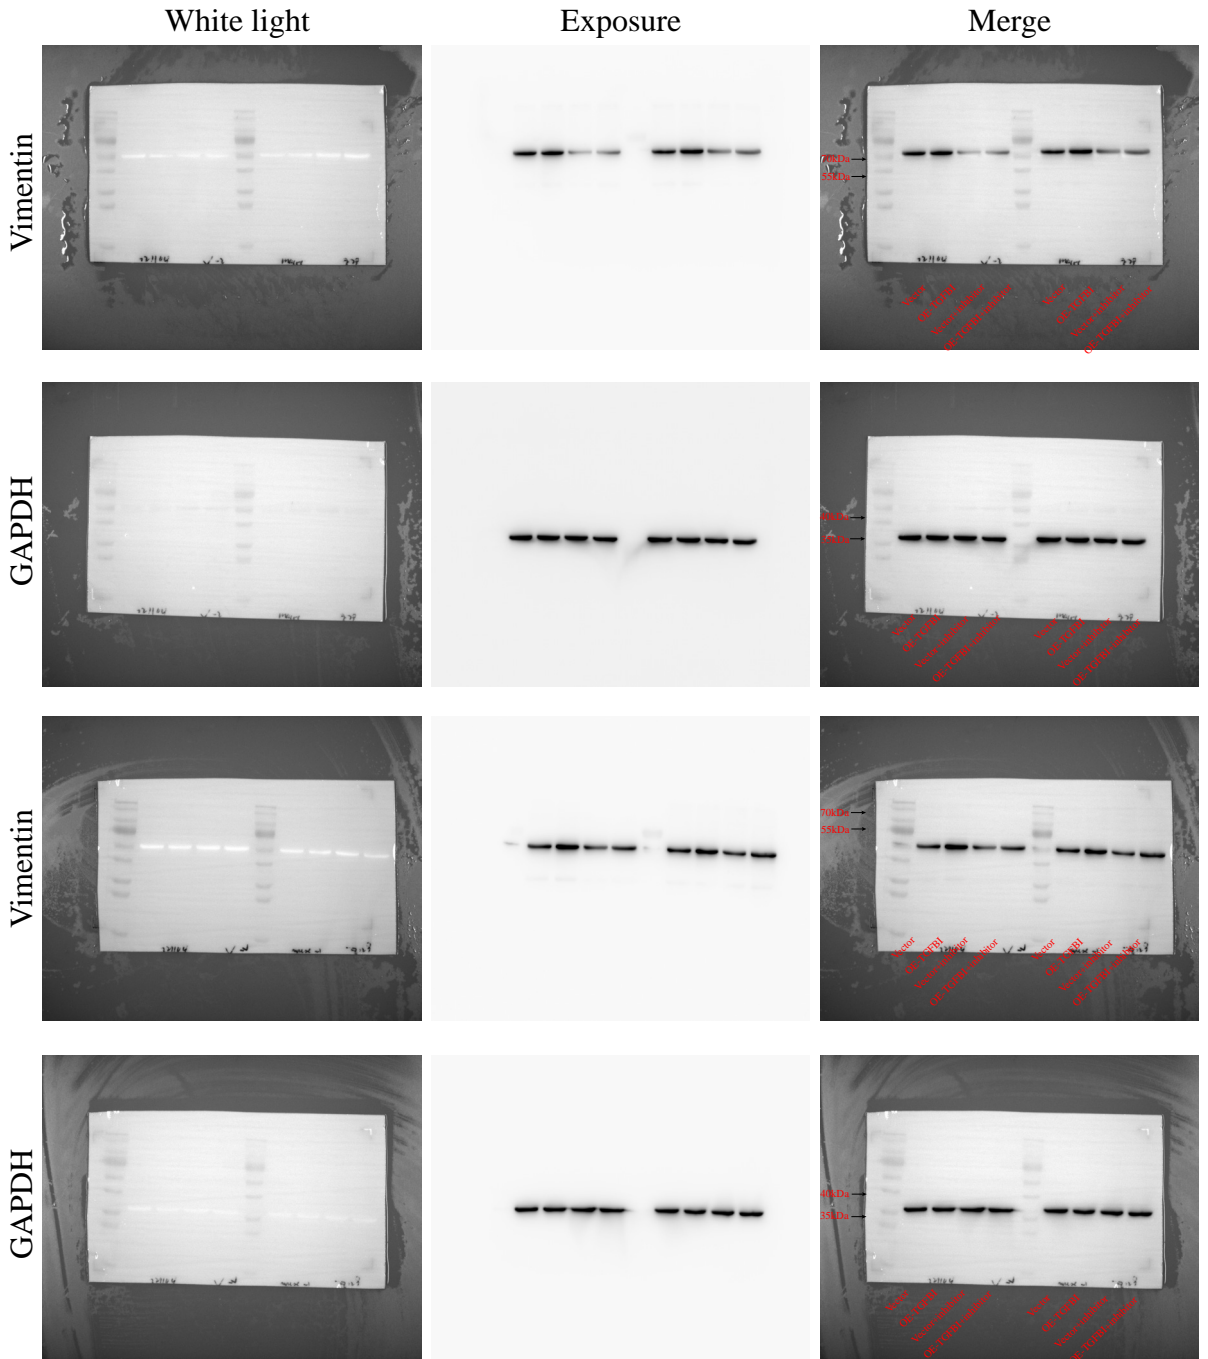

Supplementary Figure 8. The expression of TGFBI in LN229 cells and U87 cells after overexpression of TGFBI. (A) Western blot was used to detect the expression level of TGFBI in LN229 cells. (B) Western blot was used to detect the expression level of TGFBI in U87-MG cells.

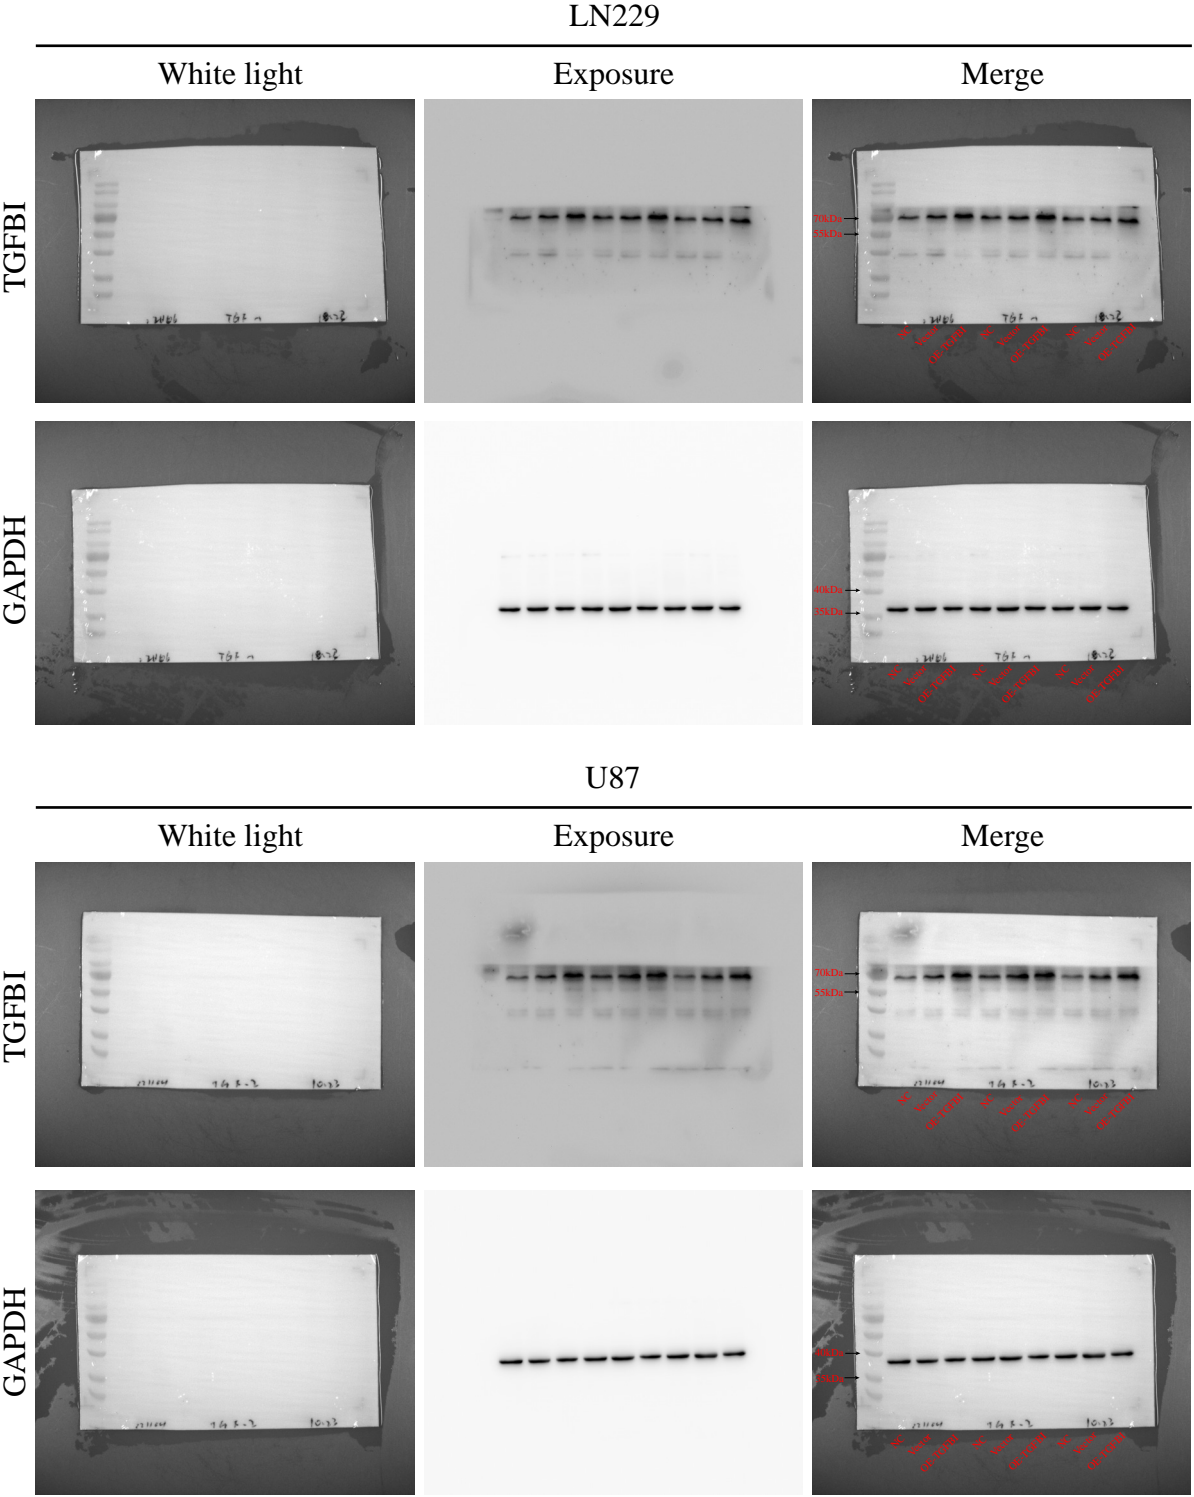

Supplement: 12883_2024_3924_MOESM3_ESM.pdf [file 12883_2024_3924_MOESM3_ESM.pdf]
